# Supplementary material for: Particulate Matter Exposure after a Cancer Diagnosis and All-Cause Mortality in a Regional Cancer Registry-Based Cohort in South Korea
Source: MDPI journal article supplement (doi:10.3390/ijerph19169875), 2022-08-10
Supplement: s1 [file s1]

**Table S1.** Sensitivity analyses: hazard ratios for all-cause mortality by an increase of 1 standard deviation in PM<sub>10</sub> exposure after a cancer diagnosis.

| Sensitivity                                                                                    | HR (95% CI)      |
|------------------------------------------------------------------------------------------------|------------------|
| Inclusion of patients with cancer who had missing rates for PM <sub>10</sub> data more than 5% | 1.78 (1.75–1.81) |
| Inclusion of patients with cancer who had a short follow-up duration (< 1 years)               | 1.71 (1.69–1.74) |
| Exclusion of patients with cancer who survived less than 3 years                               | 2.19 (2.11–2.28) |
| Exclusion of patients with cancer who survived less than 5 years                               | 2.55 (2.39–2.72) |
| Exclusion of patients with cancer who survived less than 7 years                               | 2.39 (2.15–2.66) |
| Cancer cohort consisting of patients who were diagnosed between 2005–2011                      | 3.22 (3.12–3.33) |
| Cancer cohort consisting of patients who were diagnosed between 2012–2018                      | 2.16 (2.06–2.25) |

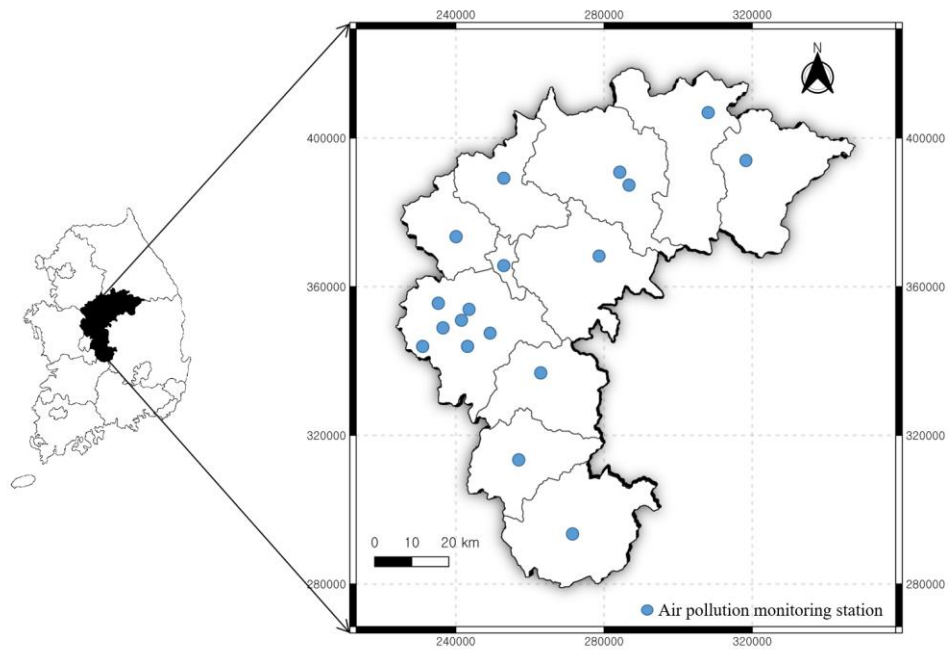

**Figure S1.** Location of air pollution monitoring station at each district in Chungbuk Province in Korea.
